# Supplementary material
Source: MDPI journal article supplement (https://www.mdpi.com/search?q=toxins-12-00679)
Supplement: s001 [file toxins-12-00679-s001.pdf]

## Supplementary Materials: Venom Function of a New Species of *Megalomyrmex* Forel, 1885 (Hymenoptera: Formicidae)

Kyle Sozanski, Lívia Pires do Prado, Andrew J. Mularo, Victoria A. Sadowski, Tappey H. Jones and Rachelle M.M. Adams

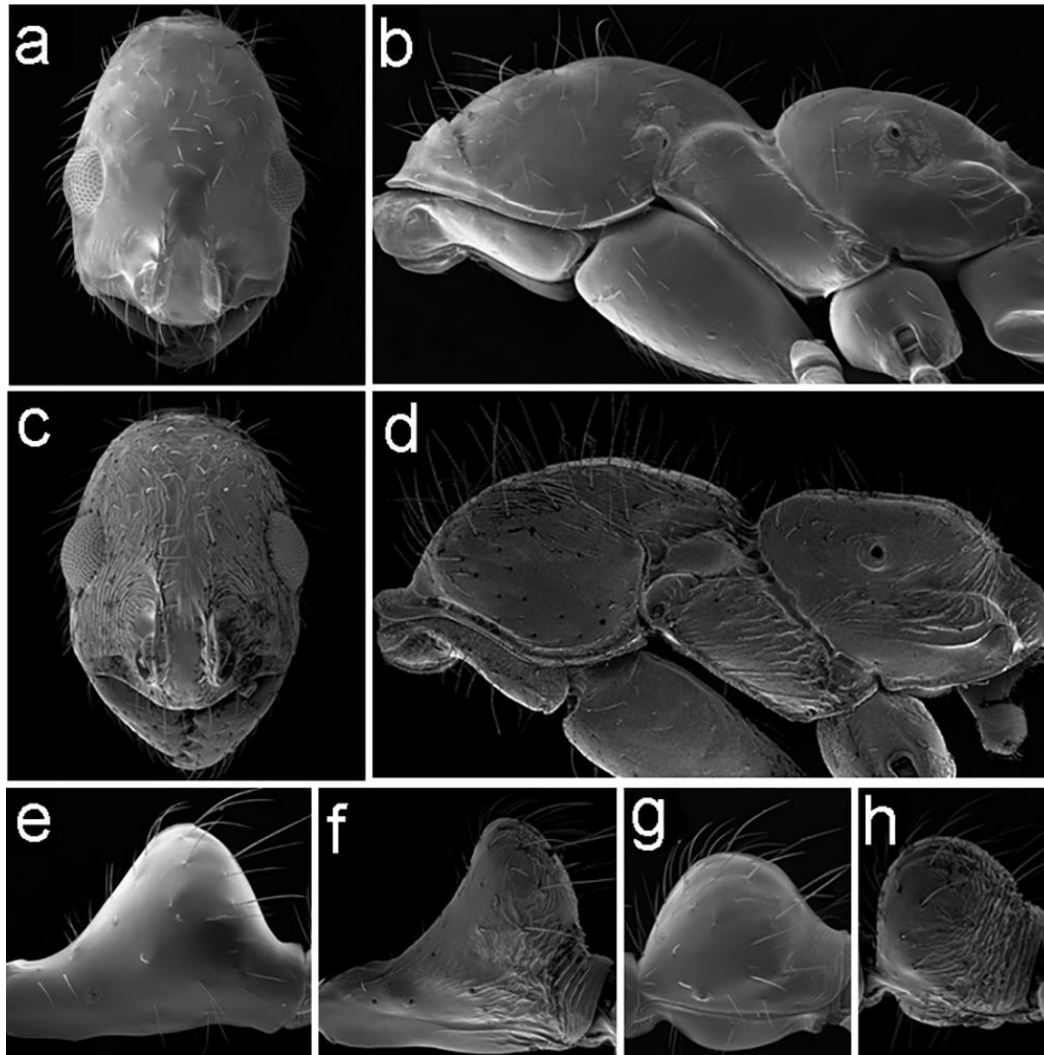

**Figure S1.** Scanning electron micrographs highlighting sculpturing differences between workers of *Megalomyrmex peetersi* sp. n. (Colombia) and *Megalomyrmex wallacei* (Brazil). (a) Head in frontal view (*M. peetersi*), (b) mesosoma in lateral view (*M. peetersi*), (c) head in frontal view (*M. wallacei*), (d) mesosoma in lateral view (*M. wallacei*), (e) petiole in lateral view (*M. peetersi*), (f) petiole in lateral view (*M. wallacei*), (g) postpetiole in lateral view (*M. peetersi*) and, (h) postpetiole in lateral view (*M. wallacei*).
